# Supplementary material for: Comparison between Three Different Techniques for the Detection of EGFR Mutations in Liquid Biopsies of Patients with Advanced Stage Lung Adenocarcinoma
Source: MDPI journal article supplement (doi:10.3390/ijms24076410), 2023-03-29
Supplement: s1 [file s1]

**Supplementary Table S1.** Concordance in *EGFR* mutation detection between Therascreen, Idylla and NGS HotSpot Cancer panel assays among the 54 blood samples analyzed.

| N  | Sample | Therascreen<br>T790M | Idylla<br>T790M | NGS<br>T790M | Therascreen<br>Del EX19 | Idylla<br>Del EX 19 | NGS<br>Del EX 19 | Therascreen<br>L858R | Idylla<br>L858R | NGS<br>L858R |
|----|--------|----------------------|-----------------|--------------|-------------------------|---------------------|------------------|----------------------|-----------------|--------------|
| 1  | TRF    |                      |                 |              | POS                     | POS                 | POS              |                      |                 |              |
| 2  | DSM    |                      |                 |              | POS                     | POS                 | POS              |                      |                 |              |
| 3  | GAM    |                      |                 |              | POS                     | POS                 | POS              |                      |                 |              |
| 4  | MSN-2  |                      |                 |              | POS                     | POS                 | POS              |                      |                 |              |
| 5  | ARG    | POS                  | POS             | POS          | POS                     | POS                 | POS              |                      |                 |              |
| 6  | VCV    | POS                  | POS             | POS          | POS                     | POS                 | POS              |                      |                 |              |
| 7  | PLG    | POS                  | POS             | POS          |                         |                     |                  |                      |                 |              |
| 8  | SRL    | POS                  | POS             | POS          |                         |                     |                  | POS                  | POS             | POS          |
| 9  | AAC    |                      |                 |              |                         |                     |                  | POS                  | POS             | POS          |
| 10 | LBG    |                      |                 |              |                         |                     |                  | POS                  | POS             | POS          |
| 11 | LSL-1  |                      |                 |              |                         |                     |                  | POS                  | POS             | POS          |
| 12 | LSL-2  |                      |                 |              |                         |                     |                  | POS                  | POS             | POS          |
| 13 | AMM    |                      |                 |              |                         |                     |                  |                      |                 |              |
| 14 | APG    |                      |                 |              |                         |                     |                  |                      |                 |              |
| 15 | GGA    |                      |                 |              |                         |                     |                  |                      |                 |              |
| 16 | GSA    |                      |                 |              |                         |                     |                  |                      |                 |              |
| 17 | MMT    |                      |                 |              |                         |                     |                  |                      |                 |              |
| 18 | MSA    |                      |                 |              |                         |                     |                  |                      |                 |              |
| 19 | MSN-1  |                      |                 |              |                         |                     |                  |                      |                 |              |
| 20 | MOA-2  |                      |                 |              |                         |                     |                  |                      |                 |              |
| 21 | PMA    |                      |                 |              |                         |                     |                  |                      |                 |              |
| 22 | PMS    |                      |                 |              |                         |                     |                  |                      |                 |              |
| 23 | PDA    |                      |                 |              |                         |                     |                  |                      |                 |              |
| 24 | RML    |                      |                 |              |                         |                     |                  |                      |                 |              |
| 25 | SLG    |                      |                 |              |                         |                     |                  |                      |                 |              |
| 26 | CMM    |                      |                 |              |                         |                     |                  |                      |                 |              |
| 27 | DTA-1  |                      |                 |              |                         |                     |                  |                      |                 |              |
| 28 | DTA-2  |                      |                 |              |                         |                     |                  |                      |                 |              |
| 29 | DLR    |                      |                 |              |                         |                     |                  |                      |                 |              |
| 30 | BLB    |                      |                 |              |                         |                     |                  |                      |                 |              |
| 31 | CSC    |                      |                 |              |                         |                     |                  |                      |                 |              |
| 32 | CRG    |                      |                 |              |                         |                     |                  |                      |                 |              |
| 33 | GRA    |                      |                 |              |                         |                     |                  |                      |                 |              |
| 34 | MLM    |                      |                 |              |                         |                     |                  |                      |                 |              |
| 35 | MMG    |                      |                 |              |                         |                     |                  |                      |                 |              |
| 36 | MLA    |                      |                 |              |                         |                     |                  |                      |                 |              |
| 37 | MRG    |                      |                 |              |                         |                     |                  |                      |                 |              |
| 38 | NNA    |                      |                 |              |                         |                     |                  |                      |                 |              |
| 39 | GGC    |                      |                 |              |                         |                     |                  | POS                  | POS             |              |
| 40 | PLG    |                      |                 |              |                         |                     |                  |                      | POS             |              |
| 41 | VCF    |                      |                 |              |                         |                     |                  | POS                  | POS             |              |
| 42 | ASG-1  |                      |                 |              | POS                     | POS                 |                  |                      |                 |              |
| 43 | ASG-2  |                      |                 |              | POS                     |                     |                  |                      |                 |              |
| 44 | DAM    |                      |                 |              | POS                     |                     |                  |                      |                 |              |
| 45 | DSA    |                      |                 |              | POS                     |                     | POS              |                      |                 |              |
| 46 | MSN-3  |                      |                 |              | POS                     | POS                 |                  |                      |                 |              |
| 47 | NDA    |                      |                 |              | POS                     |                     |                  |                      |                 |              |
| 48 | PDG    |                      |                 |              | POS                     | POS                 |                  |                      |                 |              |
| 49 | TRE    |                      |                 |              | POS                     | POS                 |                  |                      |                 |              |
| 50 | BRA    |                      |                 | POS          | POS                     | POS                 | POS              |                      |                 |              |
| 51 | CHG    | POS                  | POS             |              | POS                     | POS                 | POS              |                      |                 |              |
| 52 | MOA-1  | POS                  | POS             |              | POS                     | POS                 | POS              |                      |                 |              |
| 53 | PMC    | POS                  | POS             |              | POS                     | POS                 | POS              |                      |                 |              |
| 54 | SCL    | POS                  | POS             |              | POS                     | POS                 | POS              |                      |                 |              |

**Supplementary Table S2.** *EGFR* mutations detected by Therascreen EGFR Plasma RGQ PCR Kit

| <b><i>EGFR</i><br/><i>Exon</i></b> | <b><i>COSMIC</i><br/><i>ID</i></b> | <b><i>Nucleotide Changes</i></b> | <b><i>Amino acidic Changes</i></b> |
|------------------------------------|------------------------------------|----------------------------------|------------------------------------|
| 19                                 | 12422                              | c.2238_2248delinsGC              | p.L747_A750>P                      |
| 19                                 | 6218                               | c.2239_2247del9                  | p.L747_E749del                     |
| 19                                 | 12383                              | c.2239_2251>C                    | p.L747_T751>P                      |
| 19                                 | 6210                               | c.2240_2251del12                 | p.L747_T751>S                      |
| 19                                 | 13551                              | c.2235_2252>AAT                  | p.E746_T751>I                      |
| 19                                 | 6223                               | c.2235_2249del15                 | p.E746_A750del                     |
| 19                                 | 6225                               | c.2236_2250del15                 | p.E746_A750del                     |
| 19                                 | 12678                              | c.2237_2251del15                 | p.E746_T751>A                      |
| 19                                 | 6254                               | c.2239_2253del15                 | p.L747_T751del                     |
| 19                                 | 12369                              | c.2240_2254del15                 | p.L747_T751del                     |
| 19                                 | 12387                              | c.2239_2258delinsCA              | p.L747_P753>Q                      |
| 19                                 | 12370                              | c.2240_2257del18                 | p.L747_P753>S                      |
| 19                                 | 12728                              | c.2236_2253del18                 | p.E746_T751del                     |
| 19                                 | 12367                              | c.2237_2254del18                 | p.E746_S752>A                      |
| 19                                 | 12384                              | c.2237_2255delinsT               | p.E746_S752>V                      |
| 19                                 | 6220                               | c.2238_2255del18                 | p.E746_S752>D                      |
| 19                                 | 6255                               | c.2239_2256del18                 | p.L747_S752del                     |
| 19                                 | 12419                              | c.2238_2252>GCA                  | p.L747_T751>Q                      |
| 19                                 | 12382                              | c.2239_2248TTAAGAGAAG>C          | p.L747_A750>P                      |
| 20                                 | 6240                               | c.2369C>T                        | p.T790M                            |
| 21                                 | 6224                               | c.2573T>G                        | p.L858R                            |

**Supplementary Table S3.** *EGFR* mutations detected by Idylla™ ctEGFR Mutation Assay

| <b><i>EGFR</i><br/>Exon</b> | <b><i>COSMIC</i><br/>ID</b> | <b><i>Nucleotide Changes</i></b> | <b><i>Amino acidic<br/>Changes</i></b> |
|-----------------------------|-----------------------------|----------------------------------|----------------------------------------|
| 18                          | 18441                       | c.2154_2155delinsTT              | p.G719C                                |
| 18                          | 6252                        | c.2155G>A                        | p.G719S                                |
| 18                          | 6253                        | c.2155G>T                        | p.G719C                                |
| 18                          | 6239                        | c.2156G>C                        | p.G719A                                |
| 19                          | No Cosmic                   | c.2239_2248delinsC               | p.L747_A750>P                          |
| 19                          | 12370                       | c.2240_2248del                   | p.L747_A750delinsS                     |
| 19                          | 12422                       | c.2238_2248delinsGC              | p.L747_A750>P                          |
| 19                          | 6218                        | c.2239_2247del9                  | p.L747_E749del                         |
| 19                          | 12383                       | c.2239_2251>C                    | p.L747_T751>P                          |
| 19                          | 6210                        | c.2240_2251del12                 | p.L747_T751>S                          |
| 19                          | 85798                       | c.2230_2249delinsGTCAA           | p.I744_A750>VL                         |
| 19                          | 1190791                     | c.2234_2248del                   | p.K745_A750delinsT                     |
| 19                          | 13549                       | c.2235_2251delinsAG              | p.E746_T751>A                          |
| 19                          | No Cosmic                   | c.2236_2253delinsCAA             | p.E746_T751>Q                          |
| 19                          | No Cosmic                   | c.2236_2253delinsCTA             | p.E746_T751>L                          |
| 19                          | No Cosmic                   | c.2237_2253delinsTA              | p.E746_T751>V                          |
| 19                          | 12386                       | c.2237_2252delinsT               | p.E746_T751>V                          |
| 19                          | 13551                       | c.2235_2252>AAT                  | p.E746_T751>I                          |
| 19                          | 6223                        | c.2235_2249del15                 | p.E746_A750del                         |
| 19                          | 6225                        | c.2236_2250del15                 | p.E746_A750del                         |
| 19                          | 12678                       | c.2237_2251del15                 | p.E746_T751>A                          |
| 19                          | 6254                        | c.2239_2253del15                 | p.L747_T751del                         |
| 19                          | 12369                       | c.2240_2254del15                 | p.L747_T751del                         |
| 19                          | 18426                       | c.2237_2256delinsTC              | p.E746_S752>V                          |
| 19                          | No Cosmic                   | c.2235_2255delinsGGT             | p.E746_S752>V                          |
| 19                          | No Cosmic                   | c.2237_2256delinsTT              | p.E746_S752>V                          |
| 19                          | 12387                       | c.2239_2258delinsCA              | p.L747_P753>Q                          |
| 19                          | 12370                       | c.2240_2257del18                 | p.L747_P753>S                          |
| 19                          | 12728                       | c.2236_2253del18                 | p.E746_T751del                         |
| 19                          | 12367                       | c.2237_2254del18                 | p.E746_S752>A                          |
| 19                          | 12384                       | c.2237_2255delinsT               | p.E746_S752>V                          |
| 19                          | 6220                        | c.2238_2255del18                 | p.E746_S752>D                          |
| 19                          | 6255                        | c.2239_2256del18                 | p.L747_S752del                         |
| 19                          | 255211                      | c.2238_2258del                   | p.L747_P753del                         |
| 19                          | 133189                      | c.2236_2256del21                 | p.E746_S752del                         |
| 19                          | 13556                       | c.2253_2276del24                 | p.S752_I759del                         |
| 20                          | No Cosmic                   | c.2307_2308delinsGCCAGCGTG       | p.D769_D770insASV                      |
| 20                          | No Cosmic                   | c.2309_2310delinsCCAGCGTGGAT     | p.D769_D770insASV                      |
| 20                          | 6241                        | c.2303G>T                        | p.S768I                                |
| 20                          | 12378                       | c.2310_2311insGGT                | p.D770_N771insG                        |
| 20                          | 48922                       | c.2311_2312insGCGTGGACA          | p.D770_N771insSVD                      |
| 20                          | 12377                       | c.2319_2320insCAC                | p.H773_V774insH                        |
| 20                          | 6240                        | c.2369C>T                        | p.T790M                                |
| 21                          | 133630                      | c.2573_2574TG>GA                 | p.L858R                                |
| 21                          | 12429                       | c.2573_2574TG>GT                 | p.L858R                                |
| 21                          | 6213                        | c.2582T>A                        | p.L861Q                                |
| 21                          | 6224                        | c.2573T>G                        | p.L858R                                |

**Supplementary Table S4. *EGFR* mutations identified by Ion AmpliSeq™ Cancer Hotspot Panel v2**

| <b><i>EGFR</i> Exon</b> | <b><i>COSMIC</i> ID</b> | <b>Nucleotide Changes</b> | <b>Amino acidic Changes</b> |
|-------------------------|-------------------------|---------------------------|-----------------------------|
| 3                       | 21683                   | c.323G>A                  | p.R108K                     |
| 7                       | 21686                   | c.865G>A                  | p.A289T                     |
| 7                       | 21685                   | c.866C>A                  | p.A289D                     |
| 7                       | 21687                   | c.866C>T                  | p.A289V                     |
| 15                      | 21689                   | c.1787C>T                 | p.P596L                     |
| 15                      | 21690                   | c.1793G>T                 | p.G598V                     |
| 18                      | 41905                   | c.2092G>A                 | p.A698T                     |
| 18                      | 28508                   | c.2104G>T                 | p.A702S                     |
| 18                      | 28511                   | c.2108T>C                 | p.L703P                     |
| 18                      | 12988                   | c.2125G>A                 | p.E709K                     |
| 18                      | 12428                   | c.2125_2127GAA>CAT        | p.E709H                     |
| 18                      | 12371                   | c.2126A>T                 | p.E709V                     |
| 18                      | 13009                   | c.2126A>G                 | p.E709G                     |
| 18                      | 13427                   | c.2126A>C                 | p.E709A                     |
| 18                      | 41603                   | c.2134T>C                 | p.F712L                     |
| 18                      | 28601                   | c.2135T>C                 | p.F712S                     |
| 18                      | 18441                   | c.2154_2155GG>TT          | p.G719C                     |
| 18                      | 6252                    | c.2155G>A                 | p.G719S                     |
| 18                      | 6253                    | c.2155G>T                 | p.G719C                     |
| 18                      | 18425                   | c.2156G>A                 | p.G719D                     |
| 18                      | 6239                    | c.2156G>C                 | p.G719A                     |
| 18                      | 12373                   | c.2159C>T                 | p.S720F                     |
| 18                      | 22992                   | c.2161G>A                 | p.G721S                     |
| 18                      | 28510                   | c.2162G>C                 | p.G721A                     |
| 18                      | 13979                   | c.2170G>A                 | p.G724S                     |
| 19                      | 13180                   | c.2188C>T                 | p.L730F                     |
| 19                      | 13432                   | c.2193G>A                 | p.W731*                     |
| 19                      | 53194                   | c.2197C>T                 | p.P733S                     |
| 19                      | 13181                   | c.2198C>T                 | p.P733L                     |
| 19                      | 18419                   | c.2200G>A                 | p.E734K                     |
| 19                      | 13182                   | c.2203G>A                 | p.G735S                     |
| 19                      | 27041                   | c.2213T>G                 | p.V738G                     |
| 19                      | 17570                   | c.2222C>T                 | p.P741L                     |
| 19                      | 13183                   | c.2225T>C                 | p.V742A                     |
| 19                      | 26509                   | c.2227G>A                 | p.A743T                     |
| 19                      | 26038                   | c.2233_2247del15          | p.K745_E749del              |
| 19                      | 14243                   | c.2234A>G                 | p.K745R                     |
| 19                      | 28517                   | c.2235_2246del12          | p.E746_E749del              |
| 19                      | 6223                    | c.2235_2249del15          | p.E746_A750del              |
| 19                      | 24869                   | c.2235_2252del18          | p.E746_T751del              |
| 19                      | 13184                   | c.2236G>A                 | p.E746K                     |
| 19                      | 6225                    | c.2236_2250del15          | p.E746_A750del              |
| 19                      | 12728                   | c.2236_2253del18          | p.E746_T751del              |
| 19                      | 133189                  | c.2236_2256del21          | p.E746_S752del              |
| 19                      | 12678                   | c.2237_2251del15          | p.E746_T751>A               |
| 19                      | 12386                   | c.2237_2252>T             | p.E746_T751>V               |
| 19                      | 12367                   | c.2237_2254del18          | p.E746_S752>A               |
| 19                      | 12384                   | c.2237_2255>T             | p.E746_S752>V               |
| 19                      | 23571                   | c.2238_2252del15          | p.L747_T751del              |
| 19                      | 6218                    | c.2239_2247del9           | p.L747_E749del              |
| 19                      | 12382                   | c.2239_2248TTAAGAGAAG>C   | p.L747_A750>P               |
| 19                      | 12383                   | c.2239_2251>C             | p.L747_T751>P               |
| 19                      | 6254                    | c.2239_2253del15          | p.L747_T751del              |
| 19                      | 6255                    | c.2239_2256del18          | p.L747_S752del              |
| 19                      | 133197                  | c.2239_2257>T             | p.L747_P753>S               |
| 19                      | 26704                   | c.2240T>C                 | p.L747S                     |
| 19                      | 6210                    | c.2240_2251del12          | p.L747_T751>S               |
| 19                      | 12369                   | c.2240_2254del15          | p.L747_T751del              |
| 19                      | 12370                   | c.2240_2257del18          | p.L747_P753>S               |
| 19                      | 18442                   | c.2241_2244AAGA>CCCG      | p.L747_R748>FP              |
| 19                      | 6219                    | c.2248G>C                 | p.A750P                     |
| 19                      | 13185                   | c.2252C>T                 | p.T751I                     |

|    |        |                         |                   |
|----|--------|-------------------------|-------------------|
| 19 | 133207 | c.2252_2275del24        | p.T751_I759del    |
| 19 | 96856  | c.2252_2276>A           | p.T751_I759>N     |
| 19 | 13556  | c.2253_2276del24        | p.S752_I759del    |
| 19 | 29274  | c.2254T>C               | p.S752P           |
| 19 | 6256   | c.2254_2277del24        | p.S752_I759del    |
| 19 | 13186  | c.2255C>A               | p.S752Y           |
| 19 | 6268   | c.2257C>T               | p.P753S           |
| 19 | 85993  | c.2260A>G               | p.K754E           |
| 19 | 13188  | c.2281G>A               | p.D761N           |
| 19 | 21984  | c.2281G>T               | p.D761Y           |
| 19 | 27042  | c.2282A>G               | p.D761G           |
| 20 | 28603  | c.2293G>A               | p.V765M           |
| 20 | 26445  | c.2300C>T               | p.A767V           |
| 20 | 6241   | c.2303G>T               | p.S768I           |
| 20 | 6242   | c.2305G>T               | p.V769L           |
| 20 | 12376  | c.2307_2308ins9         | p.V769_D770insASV |
| 20 | 14068  | c.2308G>A               | p.D770N           |
| 20 | 12427  | c.2308_2309insGTT       | p.D770>GY         |
| 20 | 12378  | c.2310_2311insGGT       | p.D770_N771insG   |
| 20 | 13003  | c.2310_2311insAAC       | p.D770_N771insN   |
| 20 | 13004  | c.2310_2311insGGC       | p.D770_N771insG   |
| 20 | 48922  | c.2311_2312insGCGTGGACA | p.D770_N771insSVD |
| 20 | 13428  | c.2311_2312ins9         | p.D770_N771insSVD |
| 20 | 13005  | c.2318A>T               | p.H773L           |
| 20 | 13433  | c.2318A>G               | p.H773R           |
| 20 | 12377  | c.2319_2320insCAC       | p.H773_V774insH   |
| 20 | 12381  | c.2319_2320ins9         | p.H773_V774insNPH |
| 20 | 13006  | c.2320G>A               | p.V774M           |
| 20 | 22954  | c.2324G>A               | p.C775Y           |
| 20 | 6226   | c.2326C>T               | p.R776C           |
| 20 | 22940  | c.2327G>A               | p.R776H           |
| 20 | 13007  | c.2335_2336GG>TT        | p.G779F           |
| 20 | 28513  | c.2350T>C               | p.S784P           |
| 20 | 13189  | c.2351C>T               | p.S784F           |
| 20 | 27110  | c.2356G>A               | p.V786M           |
| 20 | 6240   | c.2369C>T               | p.T790M           |
| 20 | 13190  | c.2375T>C               | p.L792P           |
| 20 | 12986  | c.2429G>A               | p.G810D           |
| 20 | 28610  | c.2441T>C               | p.L814P           |
| 20 | 13400  | c.2457G>A               | p.V819V           |
| 20 | 41663  | c.2462T>C               | p.I821T           |
| 21 | 12366  | c.2572C>A               | p.L858M           |
| 21 | 26129  | c.2572C>T               | p.L858L           |
| 21 | 13553  | c.2572_2573CT>AG        | p.L858R           |
| 21 | 6224   | c.2573T>G               | p.L858R           |
| 21 | 12429  | c.2573_2574TG>GT        | p.L858R           |
| 21 | 12675  | c.2575G>A               | p.A859T           |
| 21 | 12374  | c.2582T>G               | p.L861R           |
| 21 | 6213   | c.2582T>A               | p.L861Q           |
| 21 | 14070  | c.2588G>A               | p.G863D           |
| 21 | 13197  | c.2590G>A               | p.A864T           |
| 21 | 28607  | c.2603A>G               | p.E868G           |
| 21 | 53292  | c.2608C>T               | p.H870Y           |
| 21 | 33725  | c.2609A>G               | p.H870R           |
| 21 | 28605  | c.2611G>A               | p.A871T           |
| 21 | 13008  | c.2612C>G               | p.A871G           |
| 21 | 13199  | c.2618G>A               | p.G873E           |
| 21 | 26438  | c.2620G>A               | p.G874S           |
